# Supplementary material for: Anisotropic temperature–electric field phase diagrams and domain structure evolution in rhombohedral Mn-doped PIN–PMN–PT single crystals
Source: Royal Society of Chemistry journal article supplement (doi:10.1039/c8ce00994e), 2018-01-01
Supplement: c8ce00994e1.pdf [file c8ce00994e1.pdf]

## Electronic Supplementary Information

### **Anisotropic temperature-electric field phase diagrams and domain structure evolutions in rhombohedral Mn-doped PIN-PMN-PT single crystals**

Yaming Zhou<sup>a</sup>, Qiang Li<sup>\*a</sup>, Chao Xu<sup>a</sup>, Fangping Zhuo<sup>a</sup>, Donglin Liu<sup>a</sup>, Qingfeng Yan<sup>a</sup>, Yiling Zhang<sup>b</sup> and Xiangcheng Chu<sup>b</sup>

<sup>a</sup>. Department of Chemistry, Tsinghua University, Beijing 100084, China

<sup>b</sup>. State Key Laboratory of New Ceramics and Fine Processing, Tsinghua University, Beijing 100084, China.

\*E-mail: qiangli@mail.tsinghua.edu.cn

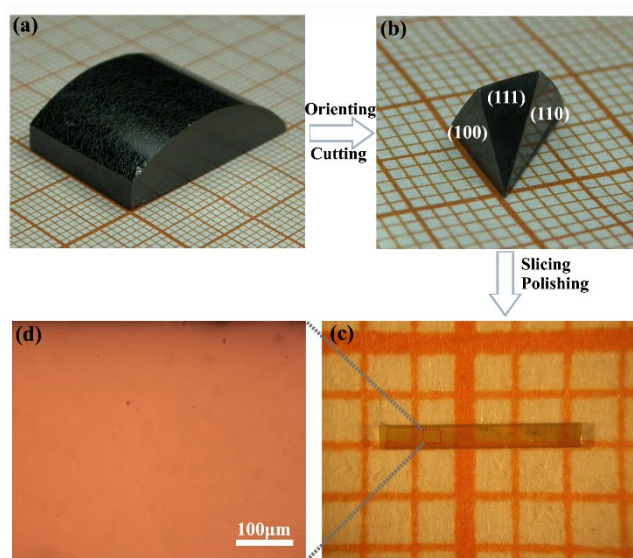

**Fig. S1** The experimental process of samples preparation for the domain structure observations in Mn:PIN-PMN-PT single crystals. The as-grown crystals were oriented and sliced ((a)-(b)) to the [100]-, [110]- and [111]-oriented samples with three mutually vertical surfaces of (100)/(010)/(001), (001)/(110)/( $\bar{1}10$ ) and (111)/(1 $\bar{1}0$ )/(11 $\bar{2}$ ) within the pseudocubic coordinates, respectively. And then the crystals with optical surface were polished to a thickness of  $\sim 100\ \mu\text{m}$  ((c)-(d)). A smooth surface of thin crystals can meet the conditions of domain structure observation under a crossed polarized light microscope.

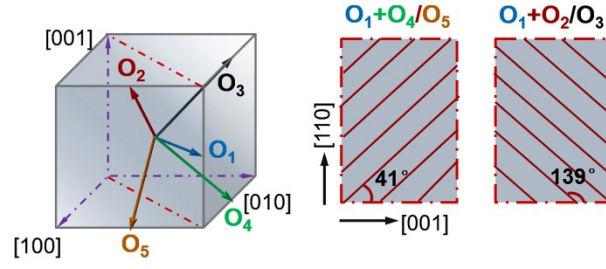

**Fig. S2** Permissible domain configurations and the 60° domain patterns at 130 °C in [110]-oriented Mn:PIN-PMN-PT single crystals. When electric field is removed, the single-domain state (10) is not stable and partly depolarize into polydomain state. In the [110]-poled crystal analyzed in this work, the four types of 60° domain twins are formed with a dominated [110] domain variant and four adjacent domain variants. The traces of these twin domain walls on  $(1\bar{1}0)$  planes form 41° or 139° angles with respect to [001].

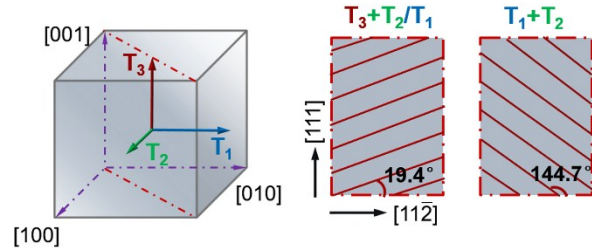

**Fig. S3** Permissible domain configurations and the 90° domain patterns at 140 °C in [111]-oriented Mn:PIN-PMN-PT single crystals with 3T engineered domain configuration. The traces of the domain walls on  $(1\bar{1}0)$  planes form 19.4° or 144.7° angles with respect to  $[11\bar{2}]$ .

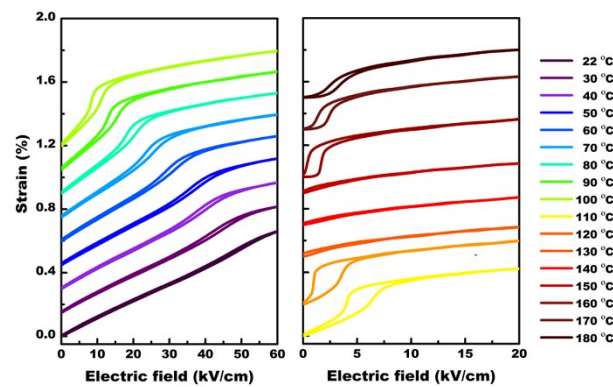

**Fig. S4** Unipolar strain-electric field loops for [100]-oriented Mn:PIN-PMN-PT single crystals at various temperatures.

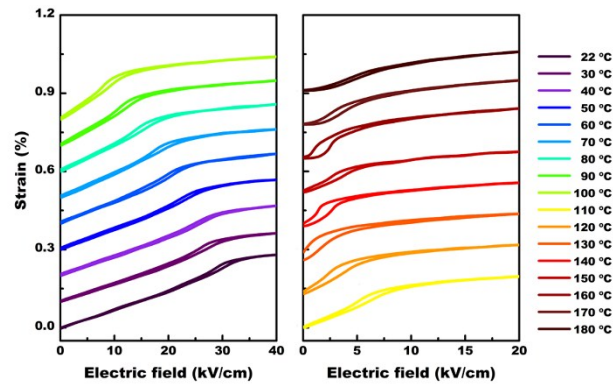

**Fig. S5** Unipolar strain-electric field loops for [110]-oriented Mn:PIN-PMN-PT single crystals at various temperatures.

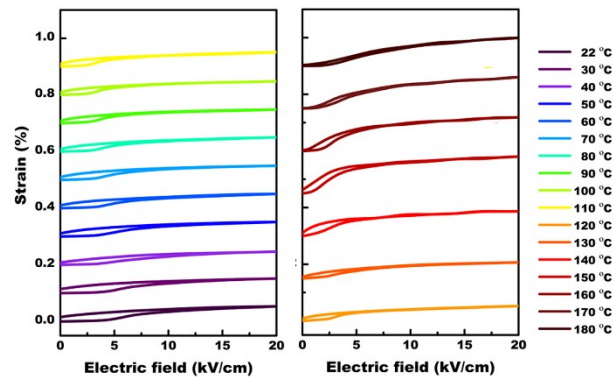

**Fig. S6** Unipolar strain-electric field loops for [111]-oriented Mn:PIN-PMN-PT single crystals at various temperatures.
